# Supplementary material for: Vancomycin-induced acute kidney injury in elderly Chinese patients: a multicenter retrospective cohort study
Source: Research Square preprint supplement (doi:10.21203/rs.3.rs-7534336/v1), 2025-10-20
Supplement: Supplementary file 1 [file 5c7c68d6a84c4e2e2c0fac0a.docx]

Supplementary Table 3. Comparative analysis of concomitant drugs used between patients with complete renal recovery and those without recovery in VI-AKI

| **Variable** | **Complete renal Recovery (n=140)** | **Non-Recovery**  **(n=500)** | ***P-*value** |
| --- | --- | --- | --- |
| Length of vancomycin therapy /day, median (IQR) | 5.75(6.4) | 5(4.8) | 0.933 |
| Length of vancomycin therapy |  |  | 0.752 |
| ≤ 7 days | 78(55.7) | 261(52.2) |  |
| >7 days and <14 days | 45(32.1) | 176(35.2) |  |
| ≥ 14 days | 17(12.1) | 63(12.6) |  |
| Mean daily dose (mg/day), median (IQR) | 1.5(1) | 1.78(1) | < 0.001 |
| Mean daily dose**,** n (%) |  |  | 0.803 |
| ≤ 1 g | 39(27.9) | 136(27.2) |  |
| >1 g and ≤ 2 g | 86(61.4) | 300(60) |  |
| >2 g | 15(10.7) | 64(12.8) |  |
| **Concomitant medications** |  |  |  |
| NSAIDs, n (%) | 5(3.6) | 7(1.4) | 0.094 |
| ACEI/ARB, n (%) | 11(7.9) | 62(12.4) | 0.135 |
| Vasopressor, n (%) | 10(7.1) | 17(3.4) | 0.052 |
| Loop diuretic, n (%) | 47(33.6) | 179(35.8) | 0.626 |
| Hydrochlorothiazide, n(%) | 2(1.4) | 9(1.8) | 0.765 |
| Spironolactone, n (%) | 35(25.0) | 98(19.6) | 0.164 |
| Licorice-containing preparation, n (%) | 10(7.1) | 45(9.0) | 0.488 |
| Calcineurin inhibitor，n (%) | 1(0.7) | 3(0.6) | 0.879 |
| Piperacillin-Tazobactam, n (%) | 9(6.4) | 34(6.8) | 0.877 |
| Aminoglycoside, n (%) | 3(2.1) | 15(3.0) | 0.588 |
| Fosfomycin, n (%) | 1(0.7) | 7(1.4) | 0.519 |
| First-generation cephalosporin, n (%) | 0(0.0) | 1(0.2) | 0.596 |
| Second-generation cephalosporin, n (%) | 3(2.1) | 10(2.0) | 0.916 |
| Third-generation cephalosporin, n (%) | 15(10.7) | 91(18.2) | 0.035 |
| Fourth-generation cephalosporin, n (%) | 4(2.9) | 20(4.0) | 0.529 |
| Carbapenem, n (%) | 64(45.7) | 228(45.6) | 0.981 |
| Proton pump inhibitors (PPIs), n (%) | 65(46.4) | 270(54.0) | 0.113 |
| Contrast media, n (%) | 3(2.1) | 13(2.6) | 0.759 |
| Vitamin C, n (%) | 22(15.7) | 66(13.2) | 0.445 |
| Acetylcysteine, n (%) | 23(16.4) | 33(6.6) | < 0.001 |

NSAIDs: Non-Steroidal Anti-Inflammatory Drugs; ACEI: Angiotensin Converting Enzyme Inhibitor; ARB: Angiotensin II Receptor Blocker; IQR: Interquartile Range
