# Supplementary material for: Vancomycin-induced acute kidney injury in elderly Chinese patients: a multicenter retrospective cohort study
Source: Research Square preprint supplement (doi:10.21203/rs.3.rs-7534336/v1), 2025-10-20
Supplement: Supplementary file 2 [file 7259cbfe672a192b08ff5fa9.docx]

Supplementary Table 2. Comparative analysis of clinical characteristics between patients with complete renal recovery and those without recovery in VI-AKI

| **Variable** | **Complete renal Recovery (n=140)** | **Non-Recovery**  **(n=500)** | ***P*-value** |
| --- | --- | --- | --- |
| **Demographic factors** |  |  |  |
| Male, n (%) | 39(27.9) | 233(46.6) | < 0.001 |
| Age, median (IQR) | 73(5.5) | 72(9) | 0.08 |
| Age |  |  | < 0.001 |
| Age≤75 | 116(70.3) | 252(53.1) |  |
| Age>75 | 49(29.7) | 223(46.9) |  |
| BMI/kg/m², median (IQR) | 22.59(4.19) | 22.31(4.46) | < 0.001 |
| **In-patient department:** |  |  | < 0.001 |
| Medical, n (%) | 30(28.3) | 215(55.6) |  |
| Surgical, n (%) | 76(71.7) | 172(44.4) |  |
| **Concomitant underlying diseases** |  |  |  |
| Hypertension, n (%) | 63(45) | 216(43.2) | 0.704 |
| Diabetes, n (%) | 36(25.7) | 120(24) | 0.676 |
| Hyperlipidemia, n (%) | 3(2.1) | 7(1.4) | 0.531 |
| Coronary heart disease, n (%) | 34(24.3) | 108(21.6) | 0.499 |
| Atrial fibrillation, n (%) | 24(17.1) | 62(12.4) | 0.146 |
| Cerebral infarction, n (%) | 22(15.7) | 77(15.4) | 0.928 |
| Cardiac insufficency, n (%) | 47(33.6) | 95(19.0) | < 0.001 |
| Liver dysfunction, n (%) | 8(5.7) | 32(6.4) | 0.767 |
| Renal insufficiency, n (%) | 10(7.1) | 61(12.2) | 0.092 |
| **SEVERITY OF ILLNESS** |  |  |  |
| LOS, median (IQR) | 36.37(37.2) | 23.04(24.3) | < 0.001 |
| ICU admission, n (%) | 2(1.4) | 63(12.6) | < 0.001 |
| Multiple organ failure, n (%) | 0 | 16(3.2) | 0.032 |
| Heart failure, n (%) | 2(1.4) | 20(4.0) | 0.14 |
| Cancer, n (%) | 26(18.6) | 104(20.8) | 0.562 |
| Sepsis, n (%) | 24(17.1) | 100(20.0) | 0.45 |
| Hypoproteinemia, n (%) | 58(49.6) | 342(77.6) | < 0.001 |
| **Laboratory parameters** |  |  |  |
| Baseline SCr, mg·dL-1 , median (IQR) | 1.11(0.5) | 1.21(0.5) | 0.00 |
| Baseline eGFR, ml·min-1 ⋅1.73-2, median (IQR) | 68.75(31.71) | 83.07(44.52) | 0.024 |
| Uric acid, μmol⋅L-1, (IQR) | 258(295) | 199(222) | 0.00 |

ICU: Intensive Care Unit; SCr: Serum Creatinine; eGFR: estimated glomerular filtration rate; IQR: Interquartile Range; LOS: Length of stay
