# Supplementary material for: Vancomycin-induced acute kidney injury in elderly Chinese patients: a multicenter retrospective cohort study
Source: Research Square preprint supplement (doi:10.21203/rs.3.rs-7534336/v1), 2025-10-20
Supplement: Supplementary file 3 [file a824aa4501aa0c4ec89c65c8.docx]

Supplementary Table 1. Factors used in the multiple logistic regression

| **For development of VI-AKI** | Gender (male)  Age (≤75 years *vs.*>75 years)  Hypertension (yes *vs.* no)  Diabetes (yes *vs.* no)  Coronary heart disease (yes *vs.* no)  Cardiac insufficiency (yes *vs.* no)  Renal insufficiency (yes *vs.* no)  ICU admission (yes *vs.* no)  Multiple Organ Failure (yes *vs.* no)  Sepsis (yes *vs.* no)  Hypoproteinemia (yes *vs.* no)  Length of stay（LOS） (day)  Length of vancomycin therapy (<7 days *vs.* ≥7 days & <14 days, ≥14 days)  Mean daily dose(≤1 g *vs.* >1 g & ≤ 2 g *vs.* >2 g)  Aminoglycosides (yes *vs.* no)  Piperacillin-tazobactam (yes *vs.* no)  Proton pump inhibitors (PPIs) (yes *vs.* no) |
| --- | --- |
| **For complete renal recovery** | Gender (male)  Age (≤75 years old *vs.*>75 years old)  Cardiac insufficency (yes *vs.* no)  Renal insufficiency (yes *vs.* no)  ICU admission (yes *vs.* no)  Multiple Organ Failure (yes *vs.* no)  Hypoproteinemia (yes *vs.* no)  Length of stay（LOS） (day)  Length of vancomycin therapy (<7 days *vs.* ≥7 days & <14 days, ≥14 days)  Mean daily dose(≤1 g *vs.* >1 g& ≤ 2 g *vs.* >2 g)  Vasopressors (yes *vs.* no)  Third-generation cephalosporins (yes *vs.* no)  Acetylcysteine (yes *vs.* no)  Acute kidney injury stage (stage 1, stage 2, stage3) |
| **For morality** | Gender (male)  Age (≤75 years old *vs.*>75 years old)  Diabetes (yes *vs.* no)  Renal insufficiency (yes *vs.* no)  ICU admission (yes *vs.* no)  Multiple Organ Failure (yes *vs.* no)  Heart failure (yes *vs.* no)  Hypoproteinemia (yes *vs.* no)  Length of stay（LOS） (day)  Length of vancomycin therapy (<7 days *vs.* ≥7 days & <14 days, ≥14 days)  Mean daily dose(≤1 g *vs.* >1 g& ≤ 2 g *vs.* >2 g)  Vasopressors (yes *vs.* no)  Hydrochlorothiazide (yes *vs.* no)  Spironolactone (yes *vs.* no)  Aminoglycosides (yes *vs.* no)  Contrast media (yes *vs.* no)  Acute kidney injury stage (stage 1, stage 2, stage3) |

VA-AKI: Vancomycin associated acute kidney injury
