# Supplementary material for: Vancomycin-induced acute kidney injury in elderly Chinese patients: a multicenter retrospective cohort study
Source: Research Square preprint supplement (doi:10.21203/rs.3.rs-7534336/v1), 2025-10-20
Supplement: Supplementary file 4 [file b620a45f5ae2006d0f263100.docx]

Supplementary Table 4. Comparative analysis of clinical characteristics between deceased group and survivor group with VI-AKI

| **Variable** | **Deceased (n=248)** | **Survivor (n=392)** | ***P*-value** |
| --- | --- | --- | --- |
| **Demographic factors** |  |  |  |
| Male, n (%) | 163(65.7) | 226(57.7) | <0.001 |
| Age, median (IQR) | 76(12.0) | 73(9.0) | <0.001 |
| Age |  |  | <0.001 |
| Age≤75 | 114(46.0) | 254(64.8) |  |
| Age>75 | 134(54.0) | 138(35.2) |  |
| BMI/kg/m², median (IQR) | 21.67(3.54) | 23.05(4.53) | 0.017 |
| **In-patient department** |  |  | <0.001 |
| Medical, n (%) | 127(62.9) | 118(40.5) |  |
| Surgical, n (%) | 75(37.1) | 173(59.5) |  |
| **Concomitant underlying diseases** |  |  |  |
| Hypertension, n (%) | 112(45.2) | 167(42.6) | 0.525 |
| Diabetes, n (%) | 73(29.4) | 83(21.2) | 0.018 |
| Hyperlipidemia, n (%) | 4(1.6) | 6(1.5) | 0.935 |
| Coronary heart disease, n (%) | 59(23.8) | 83(21.2) | 0.438 |
| Atrial fibrillation, n (%) | 32(12.9) | 54(13.8) | 0.753 |
| Cerebral infarction, n (%) | 42(16.9) | 57(14.5) | 0.414 |
| Cardiac insufficency, n (%) | 59(23.8) | 83(21.2) | 0.438 |
| Liver dysfunction, n (%) | 20(8.1) | 20(5.1) | 0.131 |
| Renal insufficiency, n (%) | 30(12.1) | 41(10.5) | 0.52 |
| **SEVERITY OF ILLNESS** |  |  |  |
| LOS, median (IQR) | 26.89(28.4) | 22.08(23.9) | 0.005 |
| ICU admission, n (%) | 39(15.7) | 26(6.6) | <0.001 |
| Multiple Organ Failure, n (%) | 14(5.6) | 2(0.5) | <0.001 |
| Heart failure, n (%) | 17(6.9) | 5(1.3) | <0.001 |
| Cancer, n (%) | 43(17.3) | 56(14.3) | 0.298 |
| Sepsis/Septicemia, n (%) | 54(21.8) | 70(17.9) | 0.222 |
| Hypoproteinemia, n (%) | 181(81.2) | 219(65.4) | <0.001 |
| **Laboratory parameters** |  |  |  |
| Baseline SCr, mg⋅dL-1 , median (IQR) | 0.89(0.2) | 0.89(0.4) | 0.808 |
| Baseline eGFR, ml·min-1 ⋅1.73-2, median (IQR) | 82.33(29.87) | 81.47(32.87) | 0.910 |
| Uric acid, μmol⋅L-1, (IQR) | 230(173) | 262(185) | 0.077 |

ICU: Intensive Care Unit; SCr: Serum Creatinine; eGFR: estimated glomerular filtration rate; IQR: Interquartile Range; LOS: Length of stay
