# Supplementary material for: Vancomycin-induced acute kidney injury in elderly Chinese patients: a multicenter retrospective cohort study
Source: Research Square preprint supplement (doi:10.21203/rs.3.rs-7534336/v1), 2025-10-20
Supplement: Supplementary file 5 [file c1d86ec275d7b80d0d97008b.docx]

Supplementary Table 5. Comparative analysis of concomitant drugs used between deceased group and survivor group with VI-AKI

| **Variable** | **Deceased (n=248)** | **Survivor (n=392)** | ***P*-value** |
| --- | --- | --- | --- |
| Length of vancomycin therapy /day, median (IQR) | 6.0(7.0) | 7.0(7.0) | 0.038 |
| Length of vancomycin therapy |  |  | 0.05 |
| ≤7 days | 146(58.9) | 193(49.2) |  |
| >7 days and < 14 days | 77(31.0) | 144(36.7) |  |
| ≥ 14 days | 25(10.1) | 55(14) |  |
| Mean daily dose (mg/day), median (IQR) | 1.48(1.0) | 1.8(0.95) | 0.032 |
| Mean daily dose**, n (%)** |  |  | 0.012 |
| ≤ 1 g | 84(33.9) | 91(23.2) |  |
| >1 g and ≤ 2 g | 135(54.4) | 251(64.0) |  |
| >2 g | 29(11.7) | 50(12.8) |  |
| **Concomitant medications** |  |  |  |
| NSAIDs, n (%) | 3(1.2) | 9(2.3) | 0.324 |
| ACEI/ARB, n (%) | 28(11.3) | 45(11.5) | 0.942 |
| Vasopressor, n (%) | 5(2.0) | 22(5.6) | 0.027 |
| Loop diuretic, n (%) | 82(33.1) | 144(36.7) | 0.344 |
| Hydrochlorothiazide, n (%) | 1(0.4) | 10(2.6) | 0.042 |
| Spironolactone, n (%) | 40(16.1) | 93(23.7) | 0.021 |
| Licorice-containing preparation, n (%) | 25(10.1) | 30(7.7) | 0.286 |
| Calcineurin inhibitor，n (%) | 3(1.2) | 1(0.3) | 0.135 |
| Piperacillin-Tazobactam, n (%) | 19(7.7) | 24(6.1) | 0.449 |
| Aminoglycoside, n (%) | 11(4.4) | 7(1.8) | 0.048 |
| Fosfomycin, n (%) | 4(1.6) | 4(1.0) | 0.511 |
| First-generation cephalosporin, n (%) | 0(0) | 1(0.3) | 0.426 |
| Second-generation cephalosporin, n (%) | 3(1.2) | 10(2.6) | 0.241 |
| Third-generation cephalosporin, n (%) | 47(19.0) | 59(15.1) | 0.196 |
| Fourth-generation cephalosporin, n (%) | 12(4.8) | 12(3.1) | 0.249 |
| Carbapenem, n (%) | 120(48.4) | 172(43.9) | 0.264 |
| Proton pump inhibitors (PPIs), n (%) | 141(56.9) | 194(49.5) | 0.069 |
| Contrast media, n (%) | 2(0.8) | 14(3.6) | 0.029 |
| Vitamin C, n (%) | 36(14.5) | 52(13.3) | 0.654 |
| Acetylcysteine, n (%) | 15(6.0) | 41(10.5) | 0.054 |

NSAIDs: Non-Steroidal Anti-Inflammatory Drugs; ACEI: Angiotensin Converting Enzyme Inhibitor; ARB: Angiotensin II Receptor Blocker; IQR: Interquartile Range
